# Supplementary material for: Pan-ERBB kinase inhibition augments CDK4/6 inhibitor efficacy in oesophageal squamous cell carcinoma
Source: PubMed Central journal article supplement — Gut. 2021 Mar 31;71(4):665–75. doi: 10.1136/gutjnl-2020-323276 (PMC8921580; doi:10.1136/gutjnl-2020-323276), 2021-03-31
Supplement: gutjnl-2020-323276supp002.pdf [file gutjnl-2020-323276supp002.pdf]

Figure S1

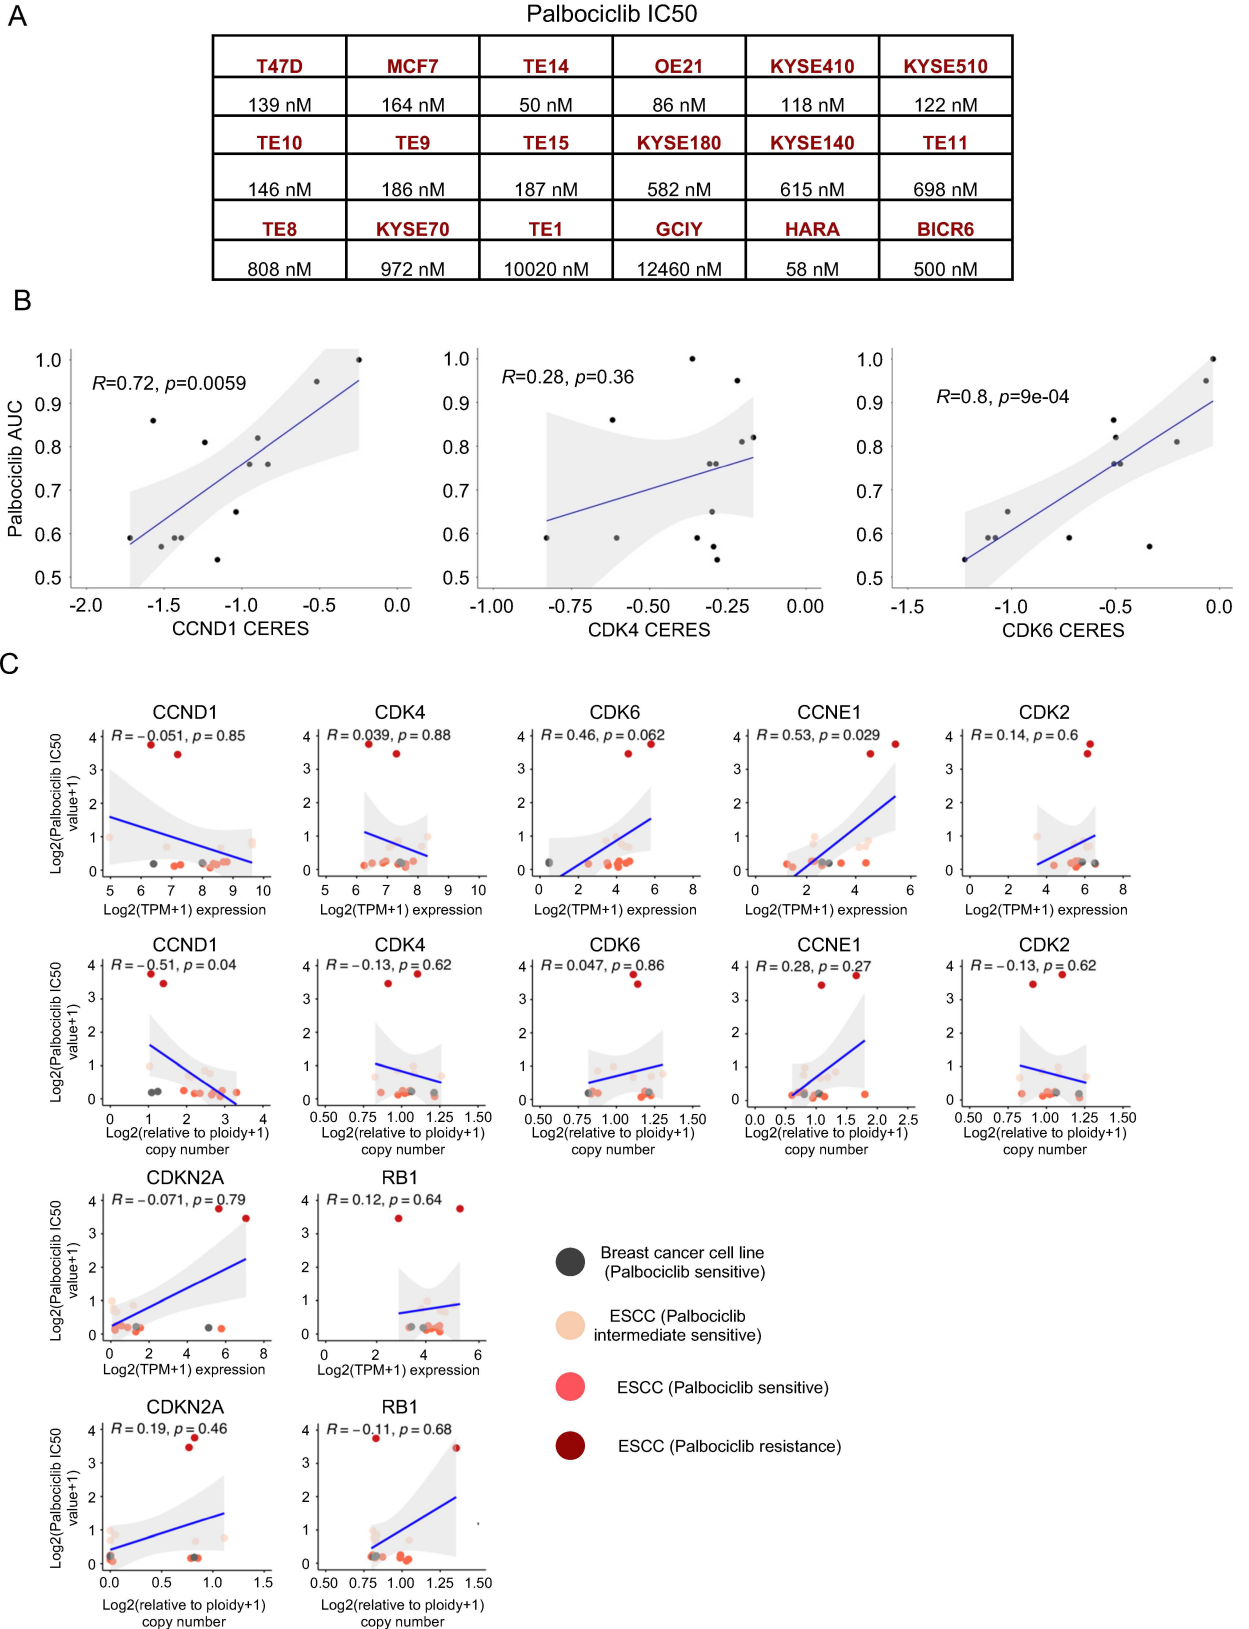

## Figure S1 Continue

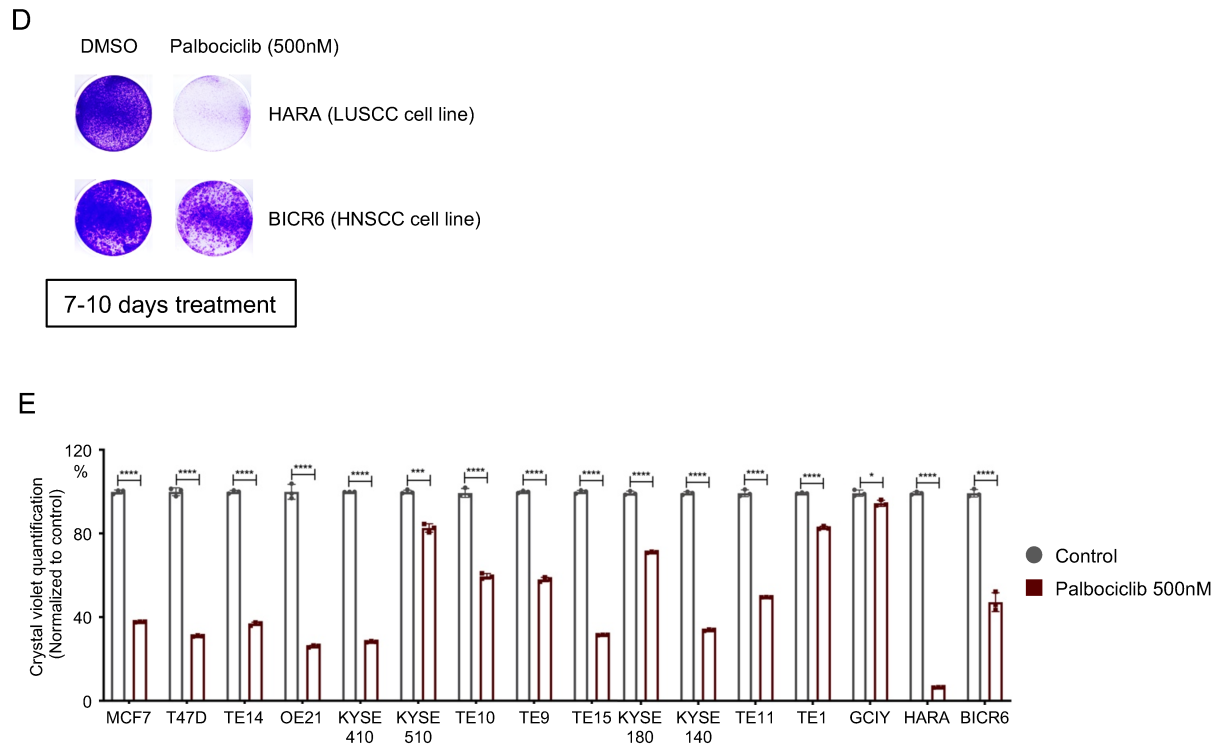

## S1: CDK4/6 inhibitors as a putative target for esophageal SCC

- A. Palbociclib IC50 value of cell lines shown in Figure 1b.
- B. Pearson correlation of palbociclib drug sensitivity AUC and gene dependency scores of CCND1, CDK4, and CDK6 in ESCC cell lines.
- C. Pearson correlation of palbociclib drug sensitivity (IC50) and relative gene expression and copy number profiles of cell-cycle genes (CCND1, CDK4, CDK6, CCNE1, CDK2, CDKN2A, RB1) across a panel of cell lines. color coded as follows: black: Palbo-sensitive ER positive breast cancer lines; red: Palbociclib sensitive ESCC lines; beige: Palbociclib intermediate sensitive ESCC lines; dark red: Palbociclib resistant ESCC lines.
- D. Images showing crystal violet staining of HARA and BICR6 after 500nM palbociclib treatment for 7–10 days. Data from one representative experiment are presented (n=3).
- E. Quantification of the crystal violet staining from Figure 1E. Data are shown as mean  $\pm$  SD and \*P<0.05, \*\*\*p<0.001 and \*\*\*\*p<0.0001 as calculated by *t*-tests (n=3).

Figure S2

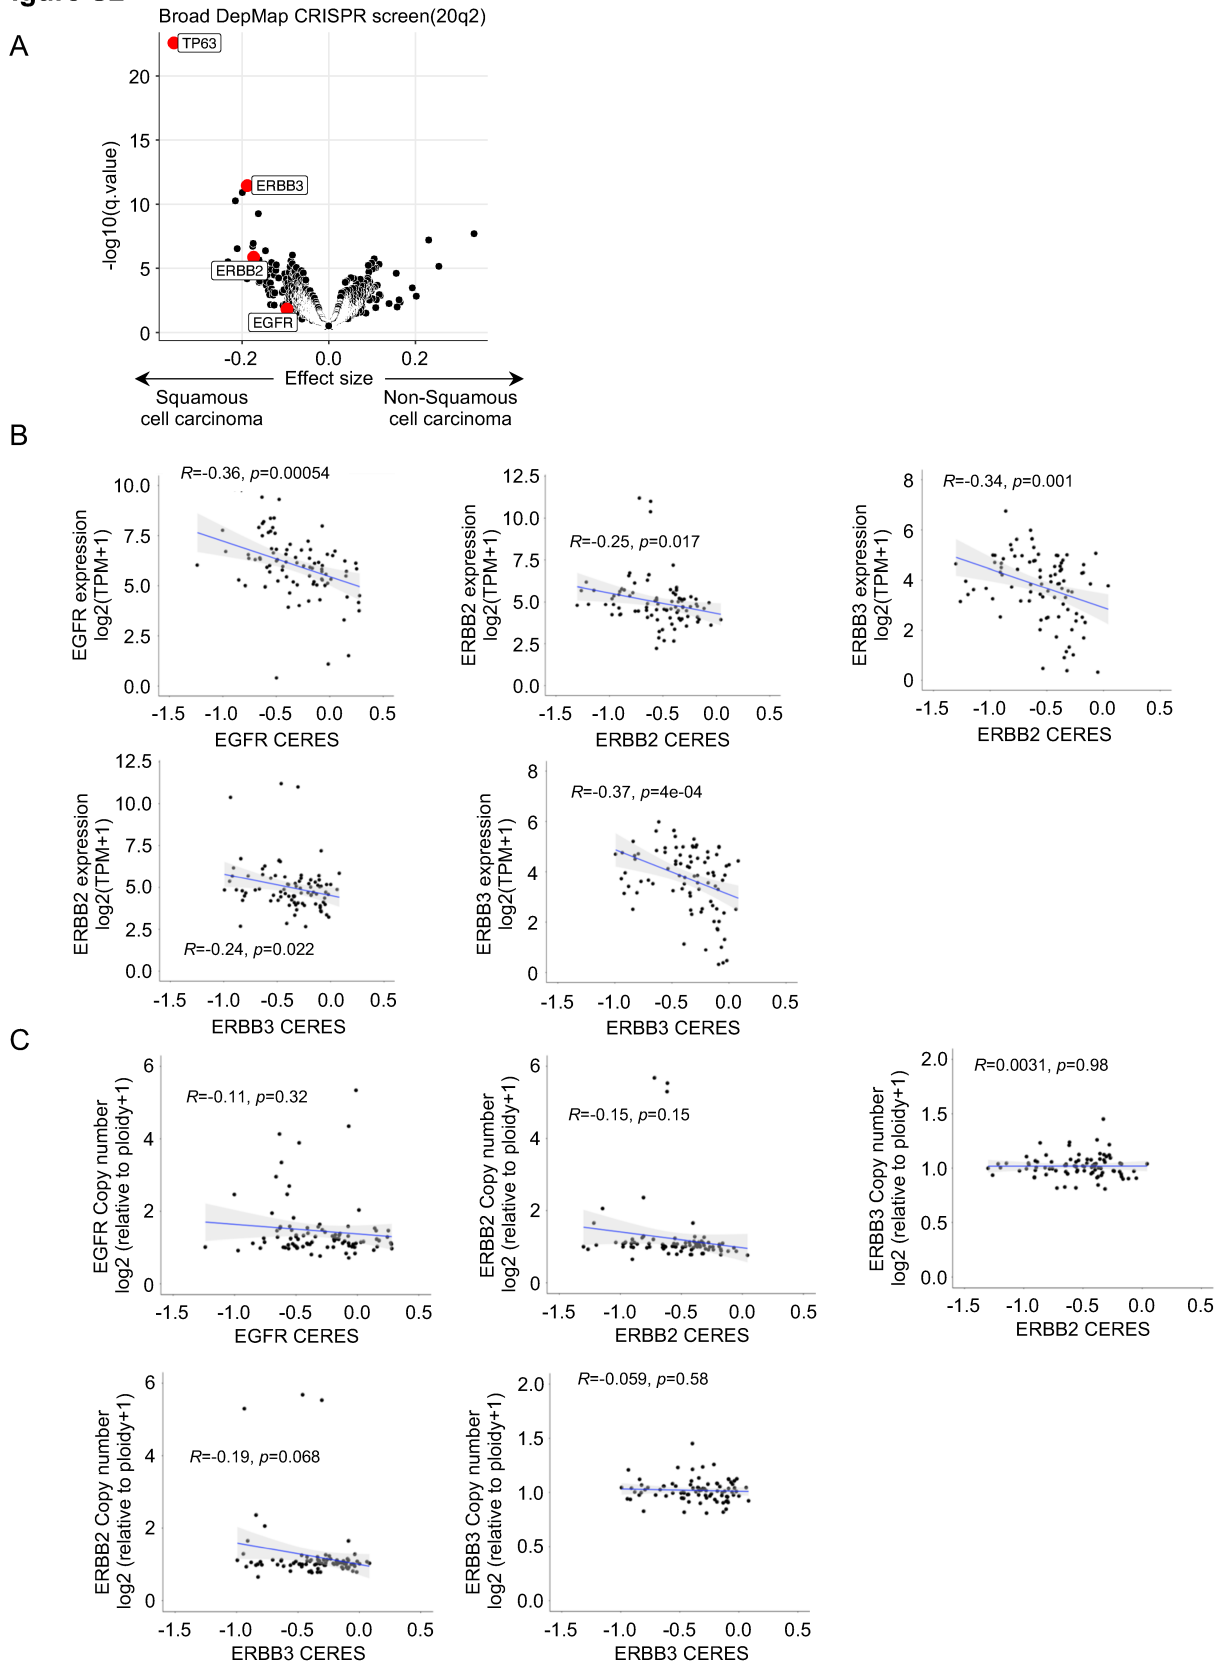

## Figure S2 Continue

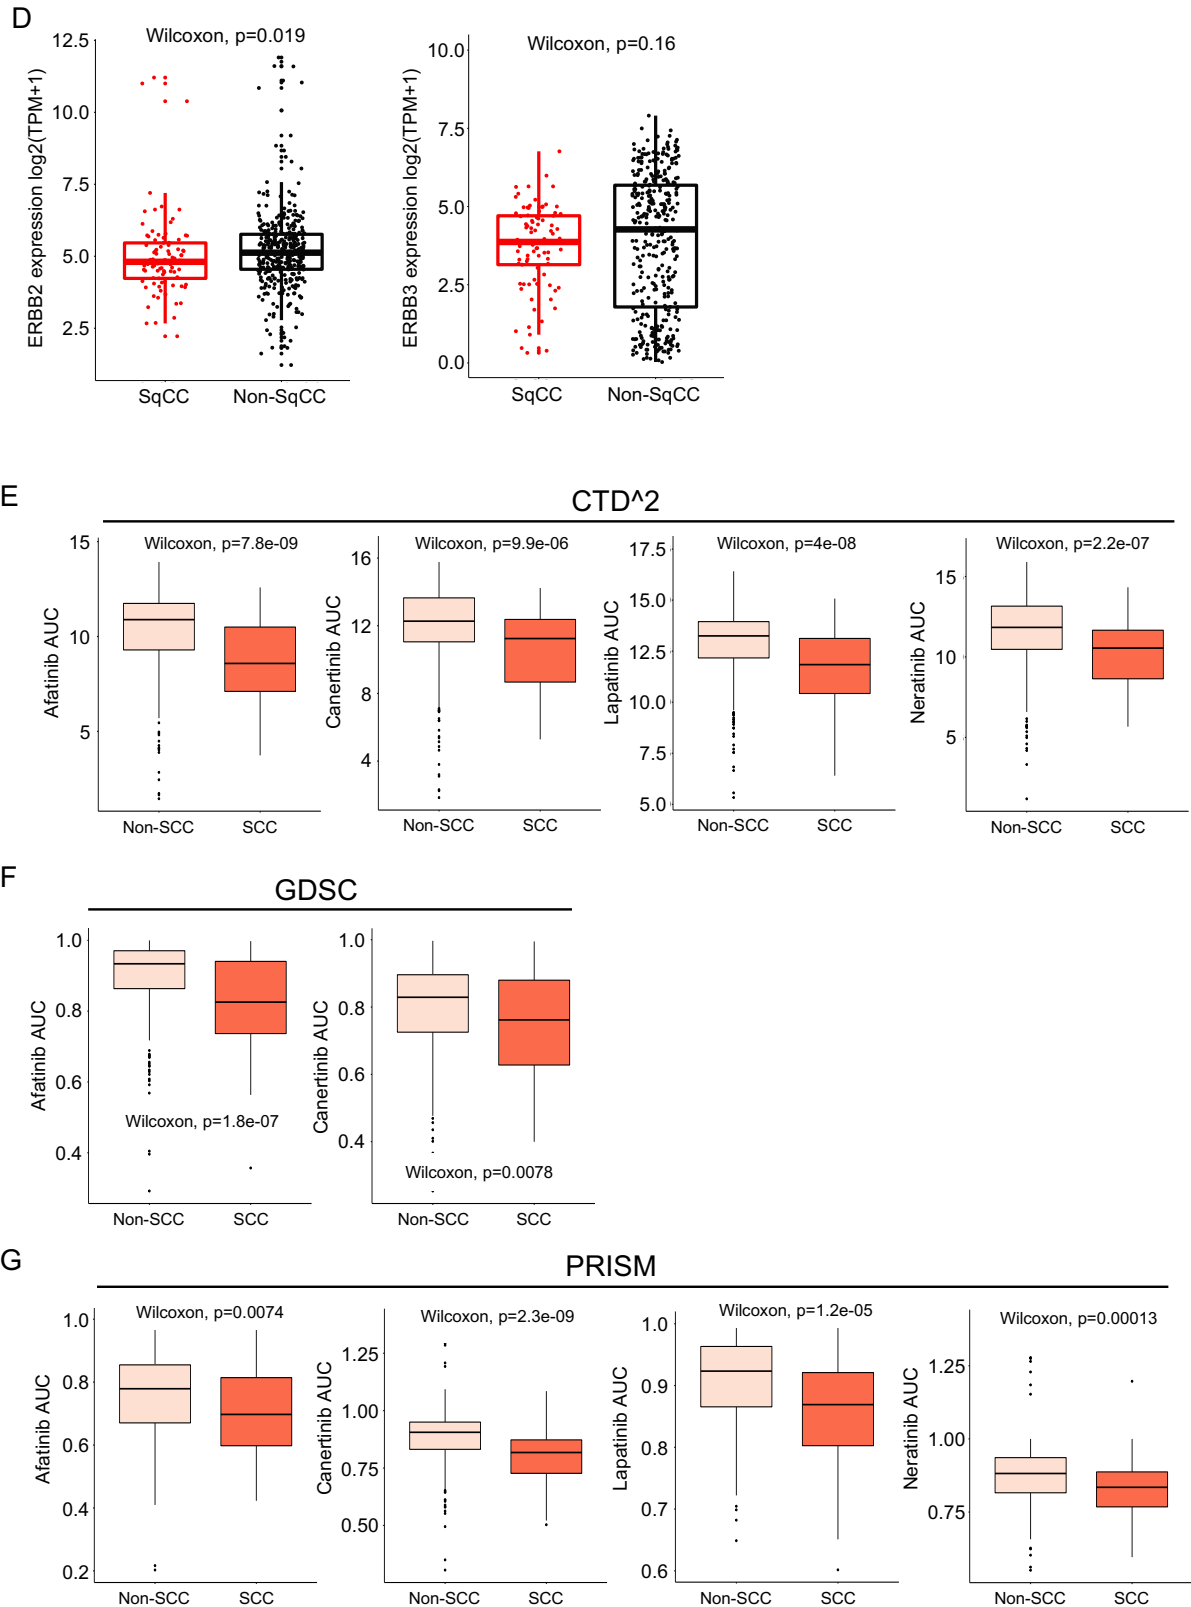

## Figure S2 Continue

H

Afatinib IC50

|             |               |             |                |                |                |
|-------------|---------------|-------------|----------------|----------------|----------------|
| <b>T47D</b> | <b>MCF7</b>   | <b>TE14</b> | <b>OE21</b>    | <b>KYSE410</b> | <b>KYSE510</b> |
| 2296 nM     | 1184 nM       | 30 nM       | 8 nM           | 82 nM          | 2600 nM        |
| <b>TE10</b> | <b>TE9</b>    | <b>TE15</b> | <b>KYSE180</b> | <b>KYSE140</b> | <b>TE11</b>    |
| 395 nM      | 179 nM        | 40 nM       | 27 nM          | 22 nM          | 91 nM          |
| <b>TE8</b>  | <b>KYSE70</b> | <b>TE1</b>  | <b>GCIY</b>    | <b>HARA</b>    | <b>BICR6</b>   |
| 1947 nM     | 400 nM        | 1854 nM     | 23 nM          | 182 nM         | 908nM          |

I

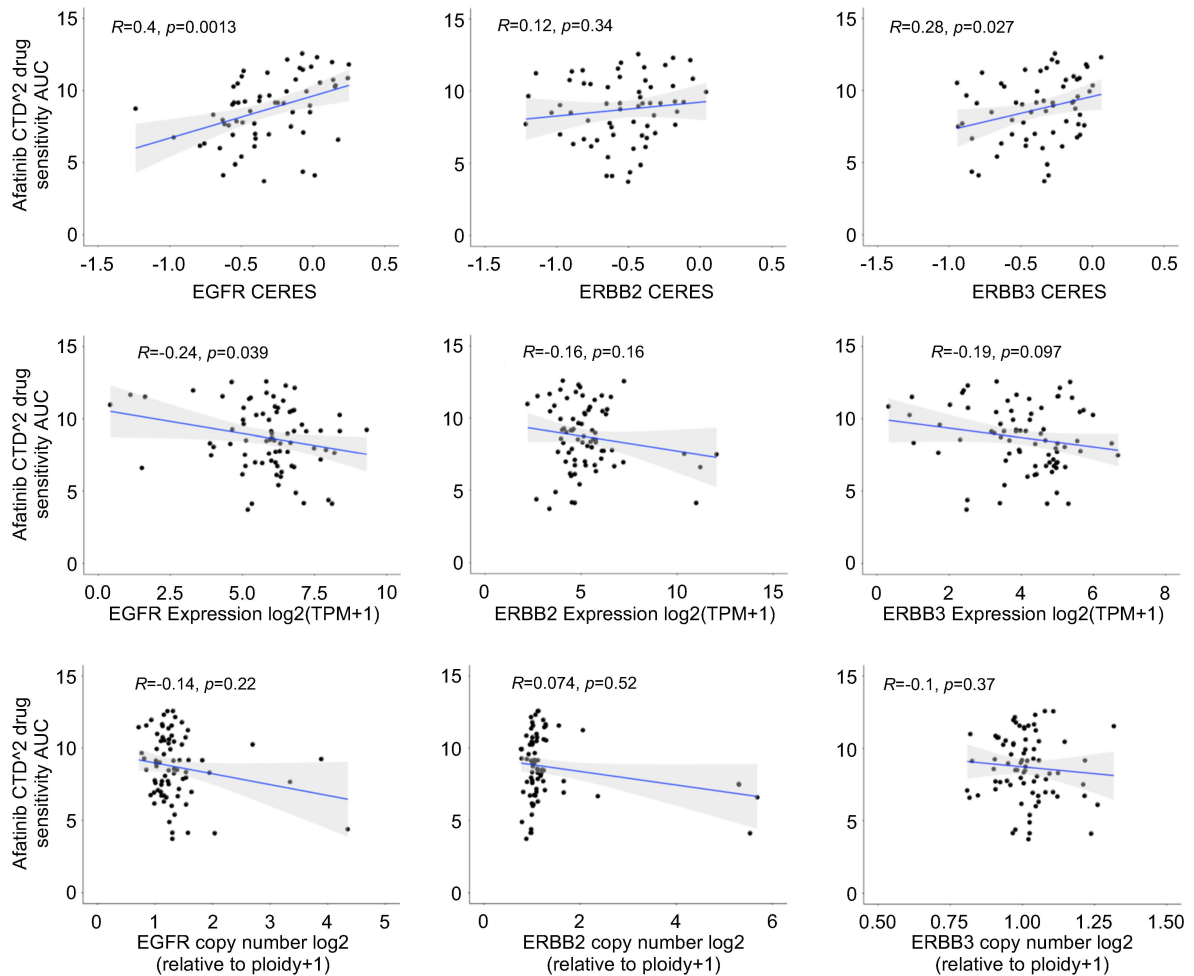

J

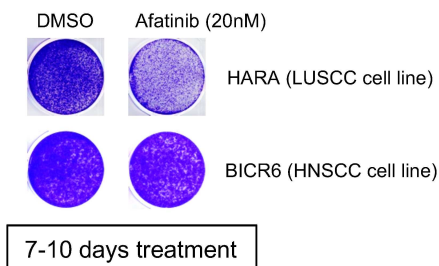

## Figure S2 Continue

K

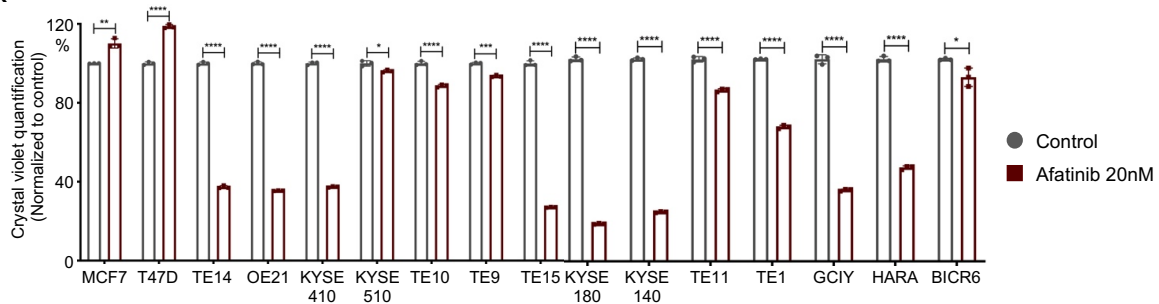

## S2: ERBB family of kinases emerge as strong dependencies across ESCC

- A. Broad Institute Achilles CRISPR screen data (DepMap 20q2 public) analysis showing selective dependency genes in squamous carcinoma cell lines and non-squamous carcinoma cell lines, as illustrated in volcano plot. Each dot represents a gene, and the effect size explains the mean difference of gene dependency score between the two groups.
- B. Pearson correlation of ERBBs gene expression and ERBBs gene dependency in squamous carcinoma cell lines.
- C. Pearson correlation of ERBBs gene relative copy number and ERBBs gene dependency in squamous carcinoma cell lines.
- D. mRNA expression of ERBB2(Left) and ERBB3(Right) in squamous cell carcinoma lines and non-squamous cell carcinoma lines based on Broad Institute Cancer Cell Line Encyclopedia data (DepMap 20Q2 public). Wilcoxon test was performed for two group comparison.
- E. Comparison of ERBB inhibitors afatinib, canertinib, lapatinib and neratinib drug sensitivity AUC data from CTRP CTD<sup>2</sup> dataset in SCC (squamous cell carcinoma) and Non-SCC (non-squamous cell carcinoma). Wilcoxon test was performed for two group comparison.
- F. Comparison of ERBB inhibitors afatinib and canertinib drug sensitivity AUC data from Sanger GDSC dataset in SCC (squamous cell carcinoma) and Non-SCC (non-squamous cell carcinoma). Wilcoxon test was performed for two group comparison.
- G. Comparison of ERBB inhibitors afatinib, canertinib, lapatinib and neratinib drug sensitivity AUC data from Broad Institute PRISM dataset in SCC (squamous cell carcinoma) and Non-SCC (non-squamous cell carcinoma). Wilcoxon test was performed for two group comparison.
- H. Afatinib IC<sub>50</sub> value of cell lines shown in Figure 2I.
- I. Pearson correlation of afatinib drug sensitivity AUC from CTD<sup>2</sup> dataset and ERBBs gene dependency score (top), gene expression (middle), and relative copy number (bottom) in squamous cell carcinoma cell lines.
- J. Images showing crystal violet staining of HARA and BICR6 after 20nM afatinib treatment for 7–10 days. Data from one representative experiment are presented (n=3).
- K. Quantification of the crystal violet staining from Figure 2K. Data are shown as mean ± SD and \*P<0.05, \*\*\*p<0.001 and \*\*\*\*p<0.0001 as calculated by *t*-tests (n=3).

Figure S3

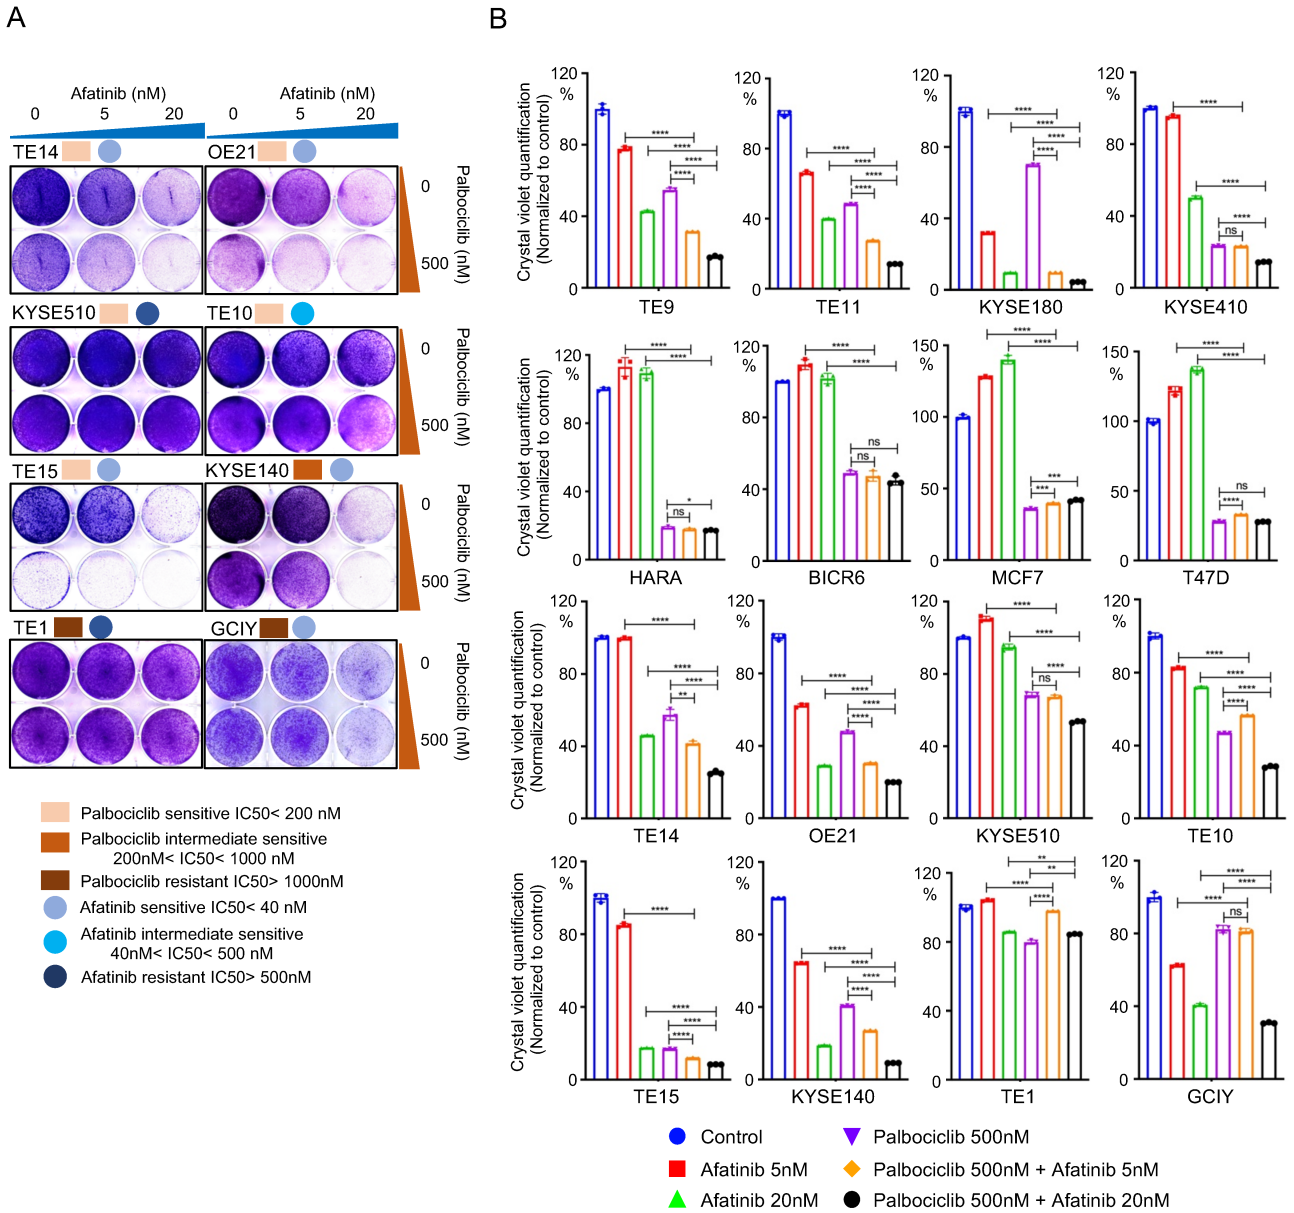

## Figure S3 Continue

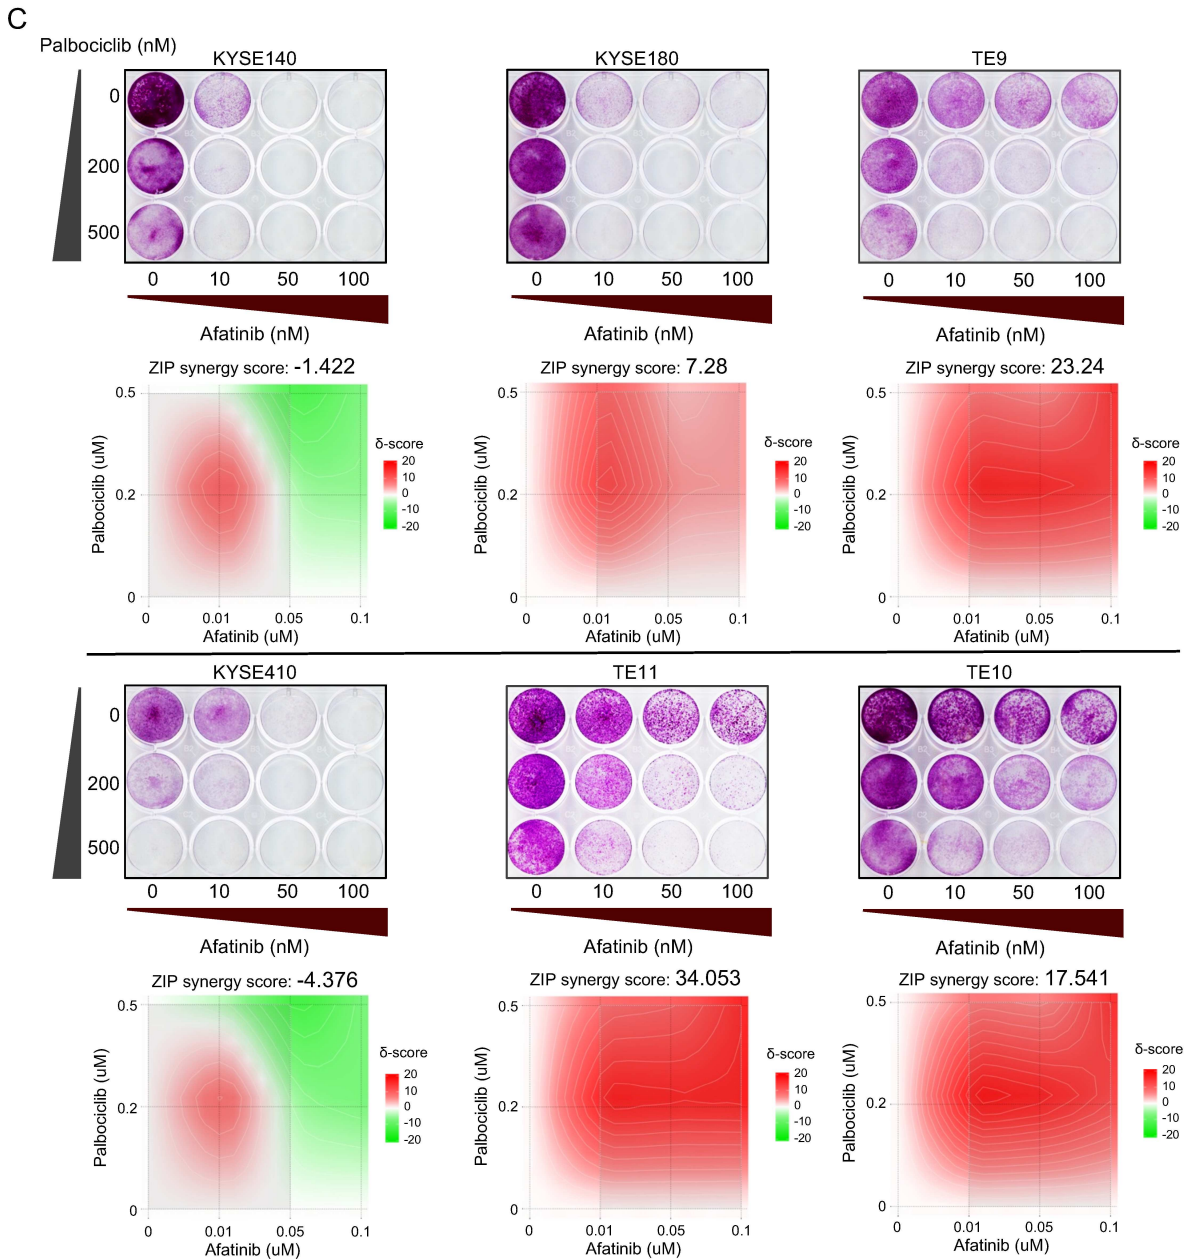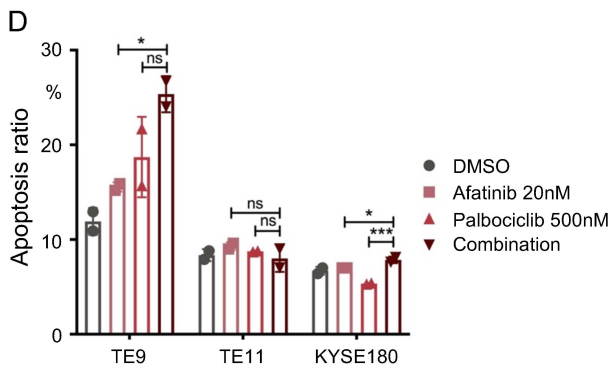**E**



## Figure S3 Continue

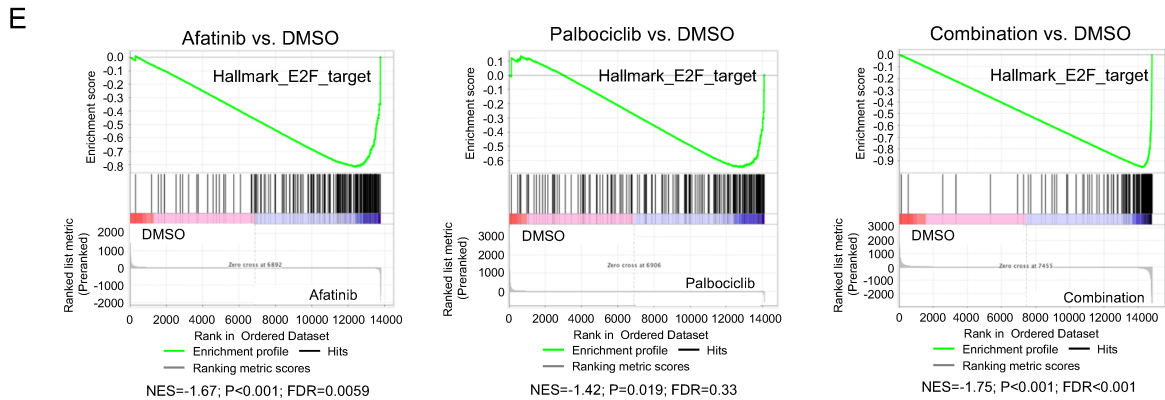

## S3: pan ERBB and CDK4/6 pathway dual inhibition demonstrated efficacy in ESCC

- A.** Images showing crystal violet staining of additional ESCC cell lines upon treatment with afatinib (20nM), palbociclib (500nM), the combination or with DMSO control for 7-10 days. Data from one representative experiment is presented (n=2).
- B.** Quantification of the crystal violet staining from Figure 3A and Supplemental Figure 3A. Data are shown as mean  $\pm$  SD and \*P<0.05, \*\*\*p<0.001 and \*\*\*\*p<0.0001 as calculated by *t*-tests (n=3).
- C.** Images showing crystal violet staining of representative squamous carcinoma cell lines upon treatment with afatinib (10nM, 50nM and 100nM), palbociclib (200nM and 500nM), the combination or with DMSO control for 7-10 days. Data from one representative experiment are presented (n=2). (bottom) Analysis of drug combination by SynergyFinder using the Zero Interaction Potency (ZIP) model using the absorbance readings of solubilized stain (normalized to no drug treatment). The combination treatment to be additive in KYSE140, KYSE180 and KYSE410 while synergistic in TE9, TE10, and TE11 (a score of less than -10 is considered antagonistic, between -10 and 10 is considered additive, and above 10 is considered synergistic; data displayed in synergy distribution maps)
- D.** The percentage of apoptotic cells of representative ESCC cell lines upon treatment with afatinib (20nM), palbociclib (500nM), the combination or with DMSO control for 72h. Following treatment, the cells were harvested, stained with annexin V and PI and assayed with flow cytometry. Data are shown as mean  $\pm$  SD and \*P<0.05, \*\*p<0.01, \*\*\*p<0.001 and \*\*\*\*p<0.0001 as calculated by the one-way ANOVA test followed by Benjamini-Hochberg correction.
- E.** Gene-Set Enrichment Analysis (GSEA) curves of HALLMARK E2F\_TARGETS gene signature in three treatments (left: 20nM afatinib, middle: 500nM palbociclib, right: combination) vs. DMSO

**Figure S4****A**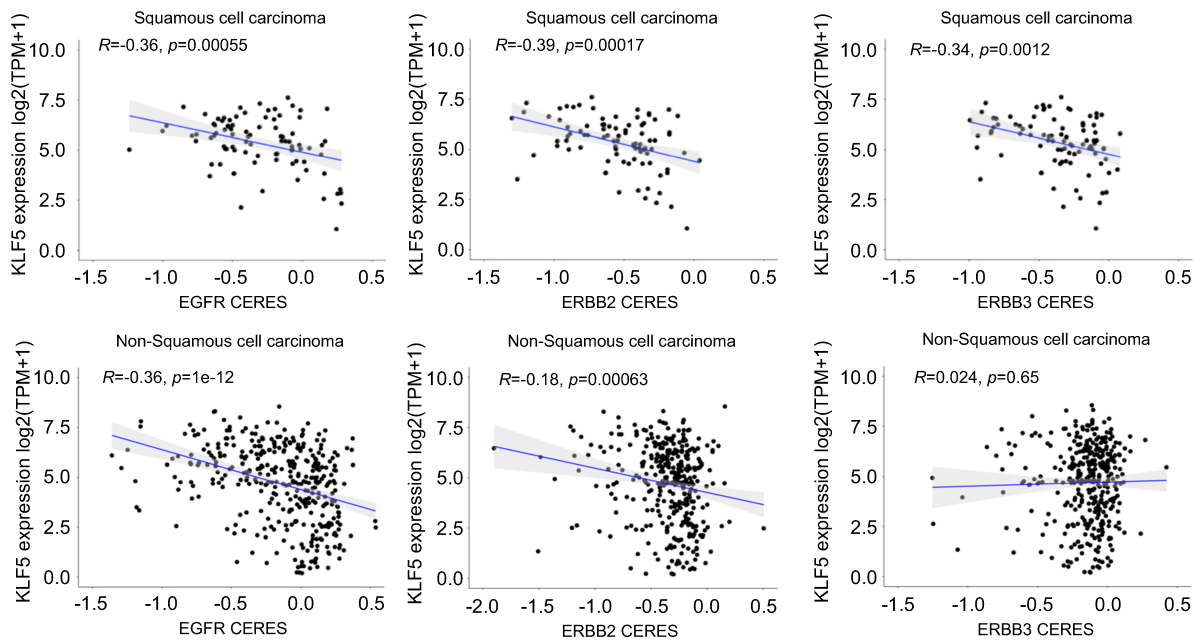**B**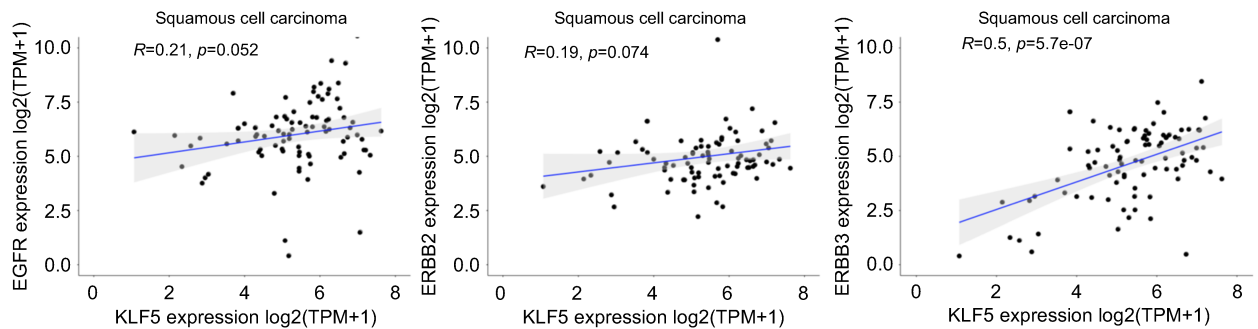

## Figure S4 Continue

C

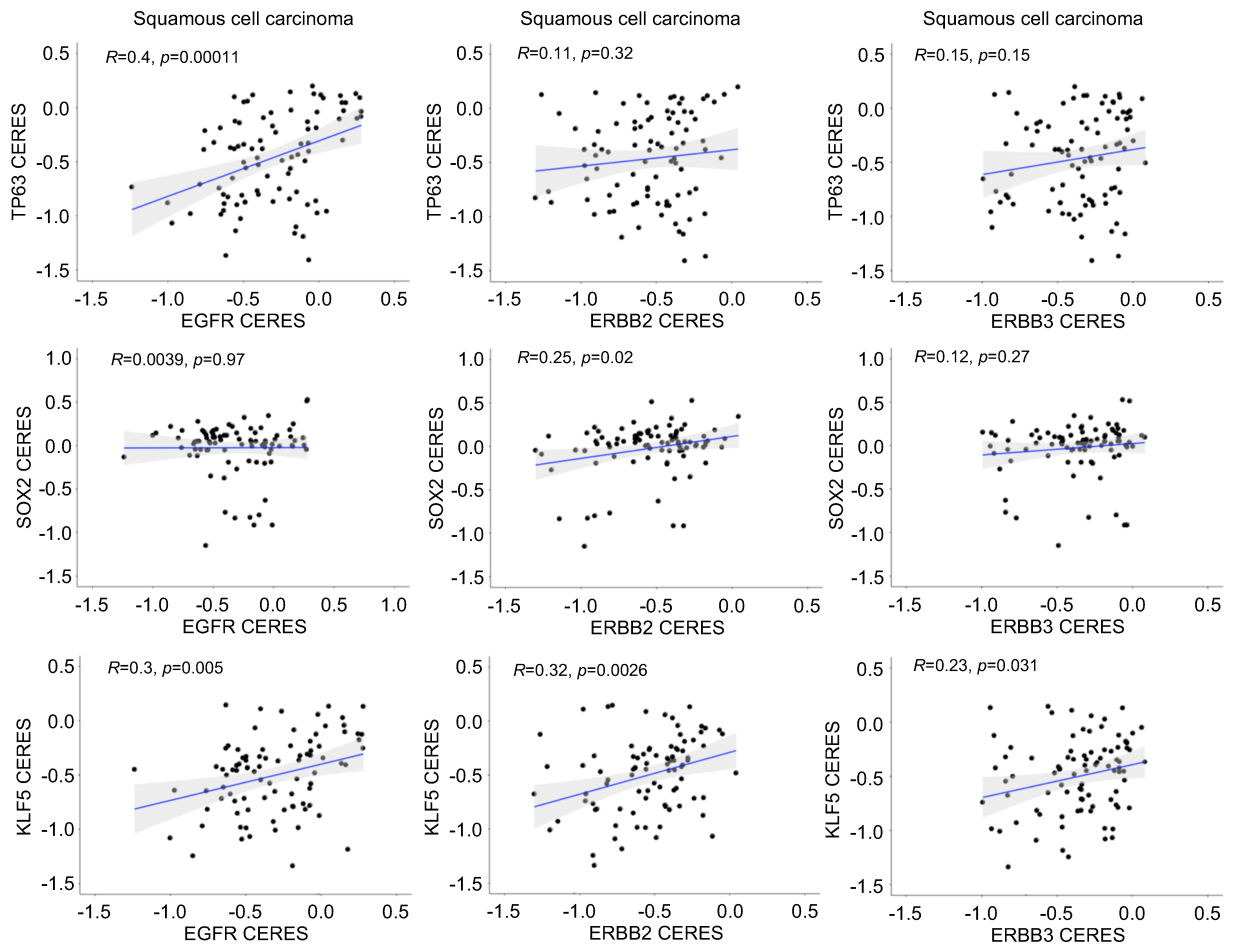

## S4: KLF5 facilitated ERBBs activation and promoted ERBBs dependency

- Pearson correlation of ERBBs gene dependency score and KLF5 gene expression in squamous cell carcinoma cell lines (Top) and Non-squamous cell carcinoma cell lines (Bottom).
- Pearson correlation of ERBBs gene expression and KLF5 gene expression in squamous cell carcinoma cell lines.
- Pearson correlation of ERBBs gene dependency score and squamous lineage transcription factor TP63 (top), SOX2 (middle) and KLF5 (bottom) dependency score in squamous cell carcinoma cell lines.
